# Supplementary material for: Comprehensive Snake Venomics of the Okinawa Habu Pit Viper, Protobothrops flavoviridis, by Complementary Mass Spectrometry-Guided Approaches
Source: Molecules. 2018 Jul 29;23(8):1893. doi: 10.3390/molecules23081893 (PMC6222445; doi:10.3390/molecules23081893)
Supplement: Supplementary file 1 [file molecules-23-01893-s001.zip › molecules-332566-supplementary-figures.pdf]

Article

# Comprehensive Snake Venomics of the Okinawa Habu Pit Viper, *Protobothrops flavoviridis*, by Complementary Mass Spectrometry-Guided Approaches

Maik Damm <sup>1,†</sup>, Benjamin-Florian Hempel <sup>1,†</sup>, Ayse Nalbantsoy <sup>2</sup> and Roderich D. Süßmuth <sup>1,\*</sup>

<sup>1</sup> Department of Chemistry, Technische Universität Berlin, 10623 Berlin, Germany; maik.damm@tu-berlin.de (M.D.); benjamin.hempel@chem.tu-berlin.de (B.-F.H.)

<sup>2</sup> Department of Bioengineering, Ege University, 35100 Izmir, Turkey; analbantsoy@gmail.com

\* Correspondence: suessmuth@chem.tu-berlin.de; Tel.: +49-30-314-24205

† These authors contributed equal to this work

**Supplementary Materials:** The following are available online, Figure S1-S5: Annotated MS2 spectra of BPP-RP, Figure S6-S9: Annotated MS2 spectra of tripeptidic svMP-i, Figure S101: *P. flavoviridis* reduced venom MS TIC for IMP and TD, Figure S11: *P. flavoviridis* venom tested for cytotoxicity against different human cell lines, Figure S12: SH-SY5Y cells after 48 h treatment with different *P. flavoviridis* venom fractions.

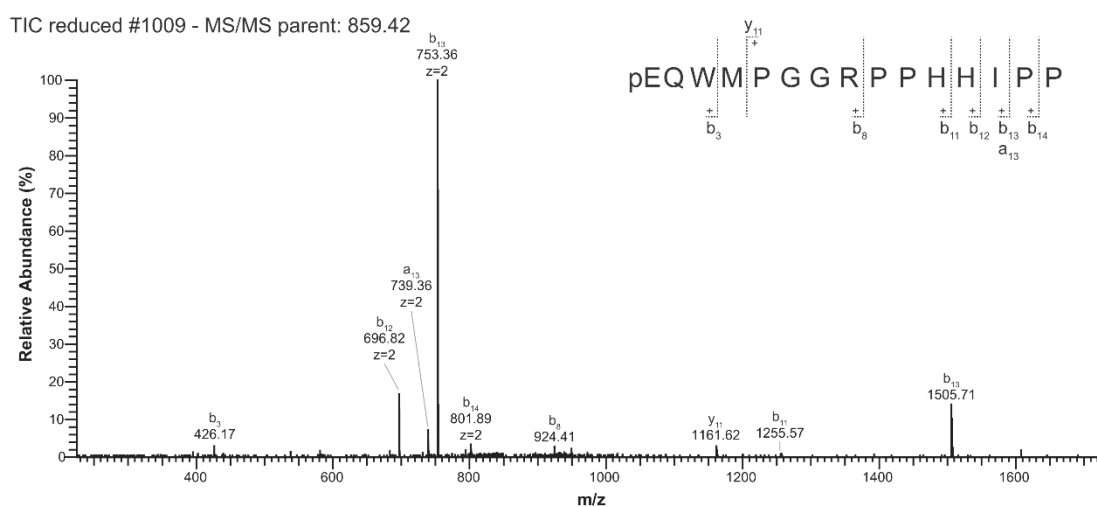

**Figure S1.** MS2 spectra of pEQWMPPGGRPPHHIPP. Representative MS/MS spectra of the  $m/z$  859.42 ( $z=2$ ) precursor ion for the top-down annotation of a BPP.

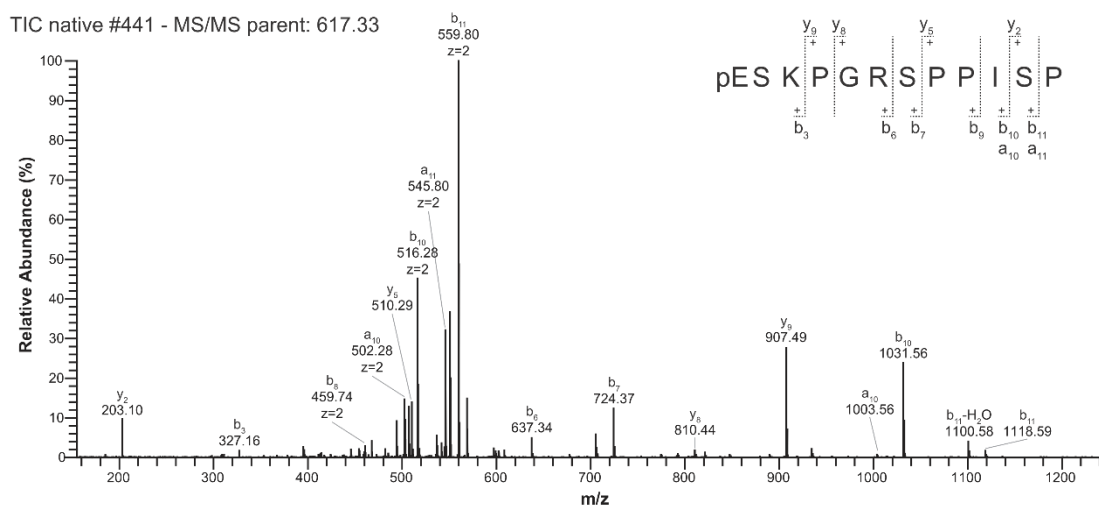

**Figure S2. MS2 spectra of pESKPGRRSPPIISP.** Representative MS/MS spectra of the  $m/z$  617.33 ( $z=2$ ) precursor ion for the top-down annotation of a BPP.

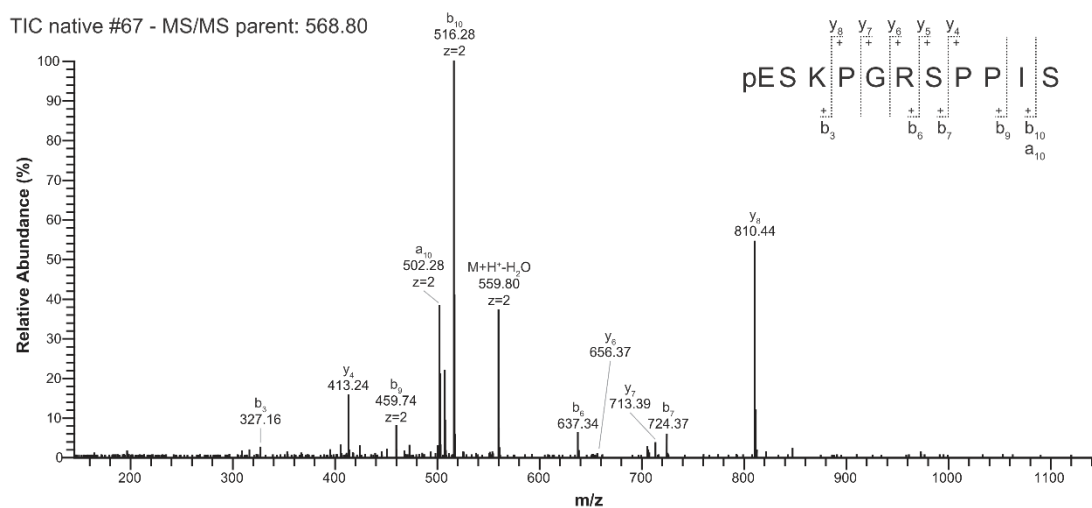

**Figure S3. MS2 spectra of pESKPGRSPPIS.** Representative MS/MS spectra of the  $m/z$  568.80 ( $z=2$ ) precursor ion for the top-down annotation of a BPP.

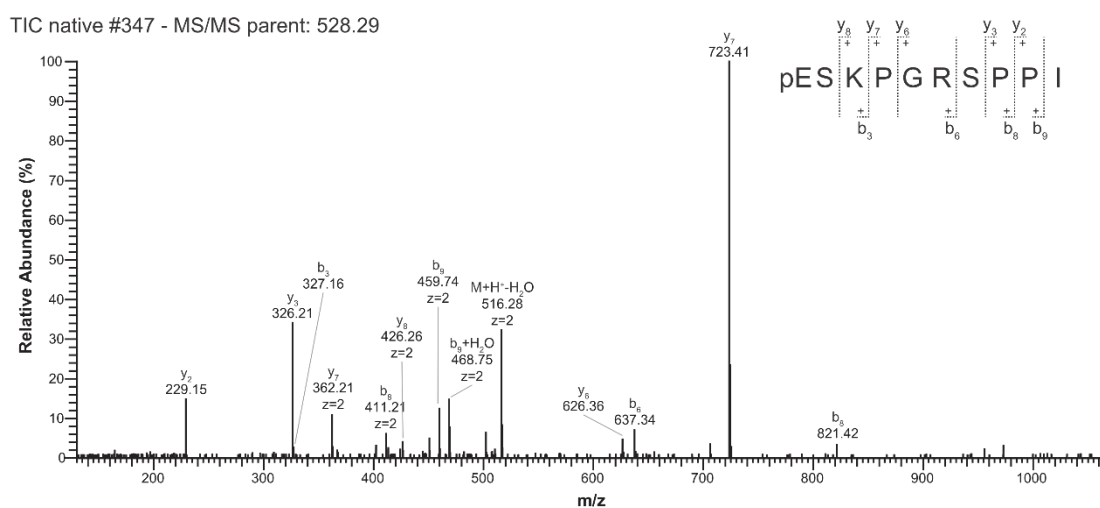

**Figure S4. MS2 spectra of pESKPGRSPPIL.** Representative MS/MS spectra of the  $m/z$  528.29 ( $z=2$ ) precursor ion for the top-down annotation of a BPP.

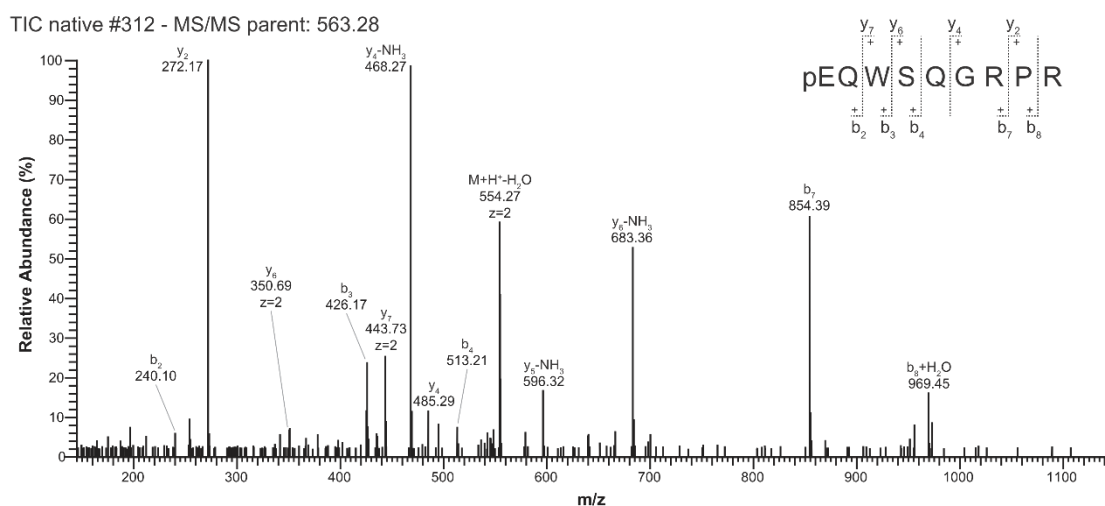

**Figure S5. MS2 spectra of pEQWSQGRPR.** Representative MS/MS spectra of the  $m/z$  563.28 ( $z=2$ ) precursor ion for the top-down annotation of a BPP.

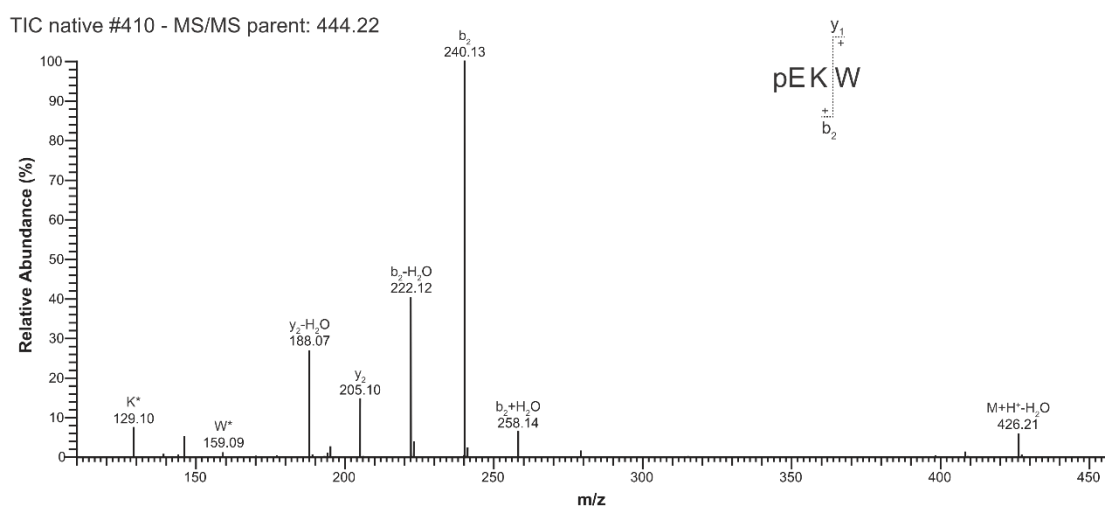

**Figure S6. MS2 spectra of pEKW.** Representative MS/MS spectra of the  $m/z$  444.22 precursor ion for the de novo annotation of a small tripeptic svMP inhibitor.

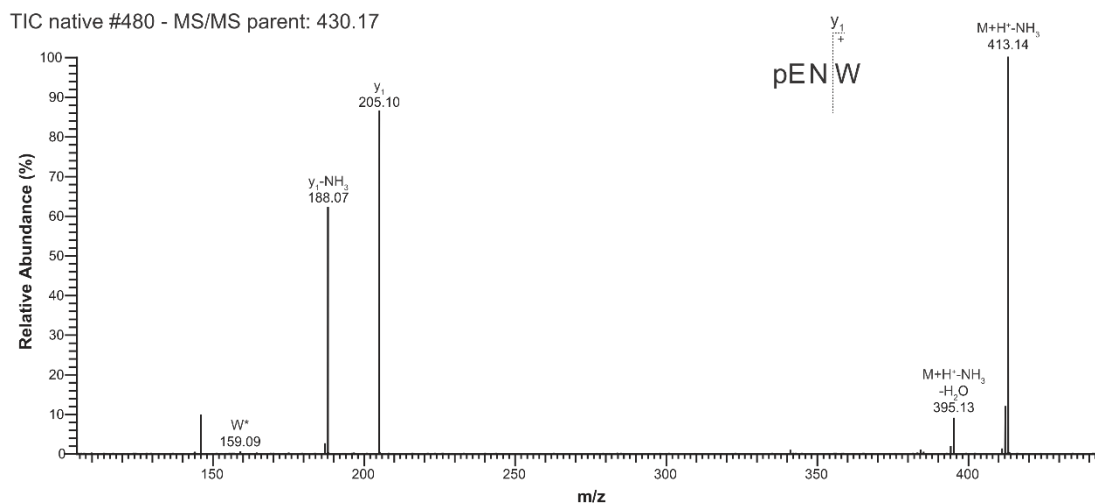

**Figure S7. S2 spectra of pENW.** Representative MS/MS spectra of the  $m/z$  430.17 precursor ion for the de novo annotation of a small tripeptic svMP inhibitor.

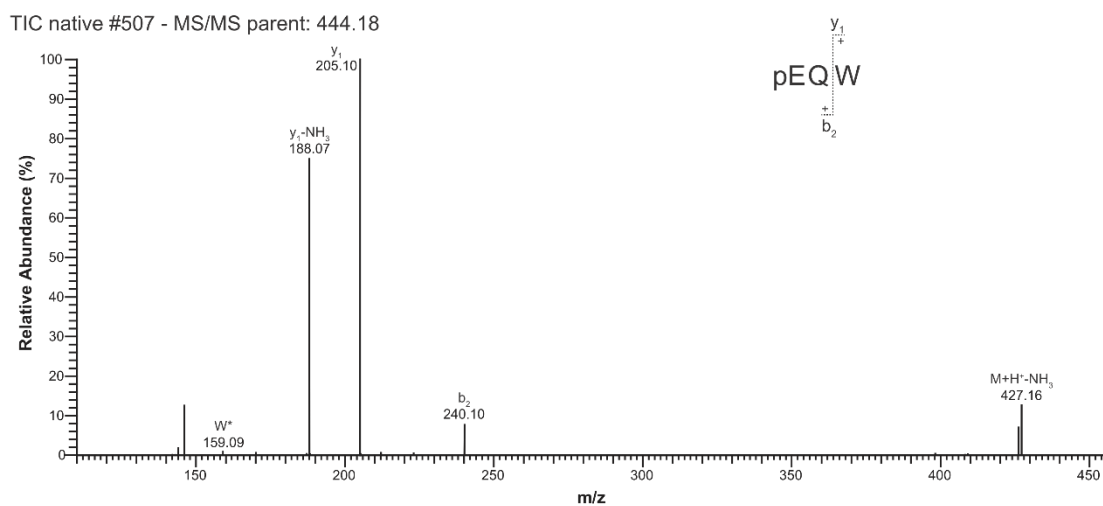

**Figure S8. MS2 spectra of pEQW.** Representative MS/MS spectra of the  $m/z$  444.18 precursor ion for the de novo annotation of a small tripeptic svMP inhibitor.

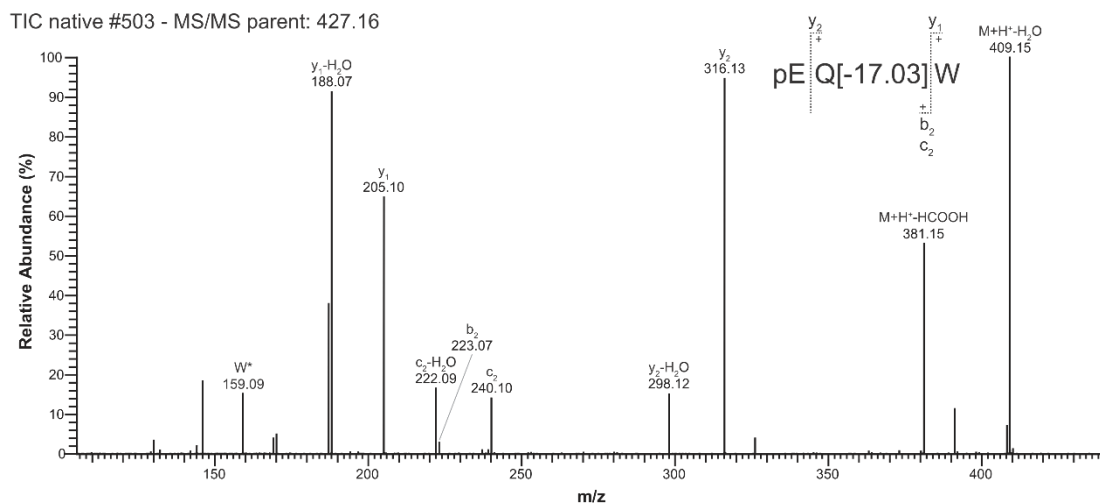

**Figure S9.** MS2 spectra of pEQ[-17.03]W/pEEW. Representative MS/MS spectra of the  $m/z$  427.16 precursor ion for the de novo annotation of a small tripeptic svMP inhibitor.

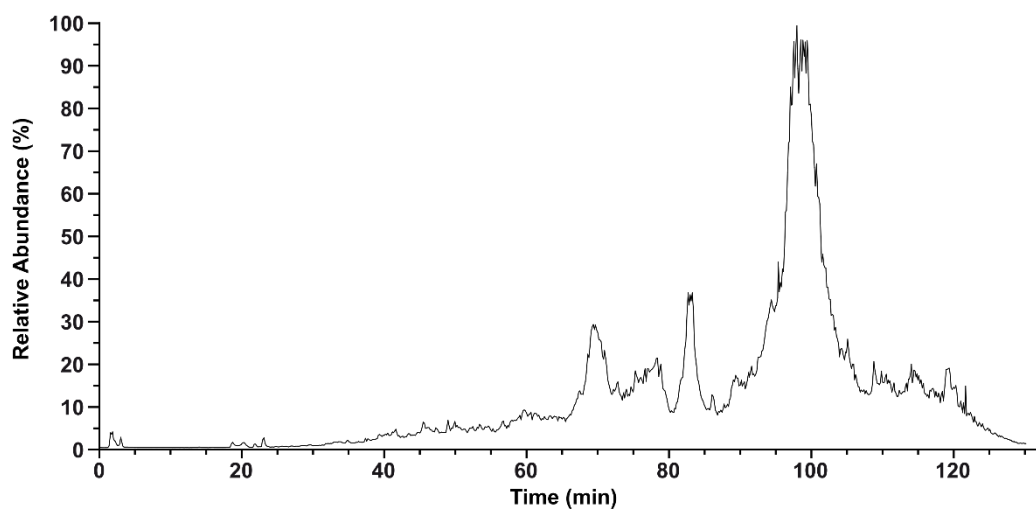

**Figure S10.** *P. flavoviridis* reduced venom MS TIC for IMP and TD. The total ion counts from *P. flavoviridis* crude venom were measured by an HPLC-ESI-MS of reduced crude venom. The relative abundance was set to 100% for the highest peak.

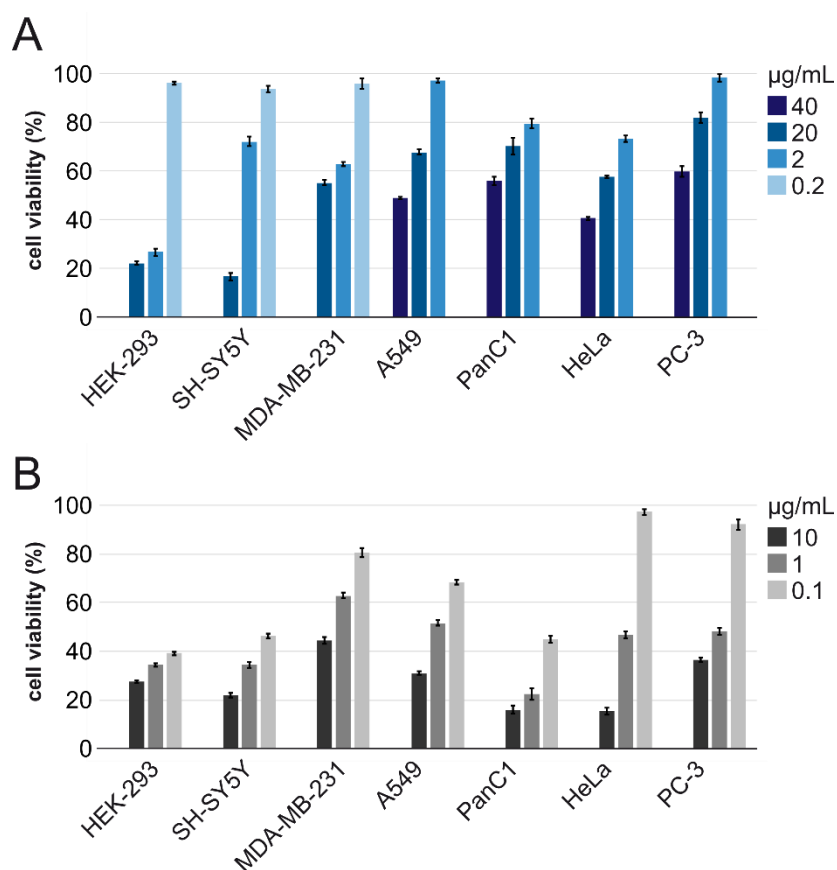

**Figure S11.** *P. flavoviridis* venom tested for cytotoxicity against different human cell lines. The effect on cell viability (%) of (A) *P. flavoviridis* crude venom was determined at various concentrations (0.2–40.0 µg/mL) and (B) Doxorubicin (0.1–10.0 µg/mL) as control after 48 h treatment by an MTT assay at 570 nm. One non-cancerous (HEK-293) and six cancerous human cell lines were tested. Error mean in ±SD.

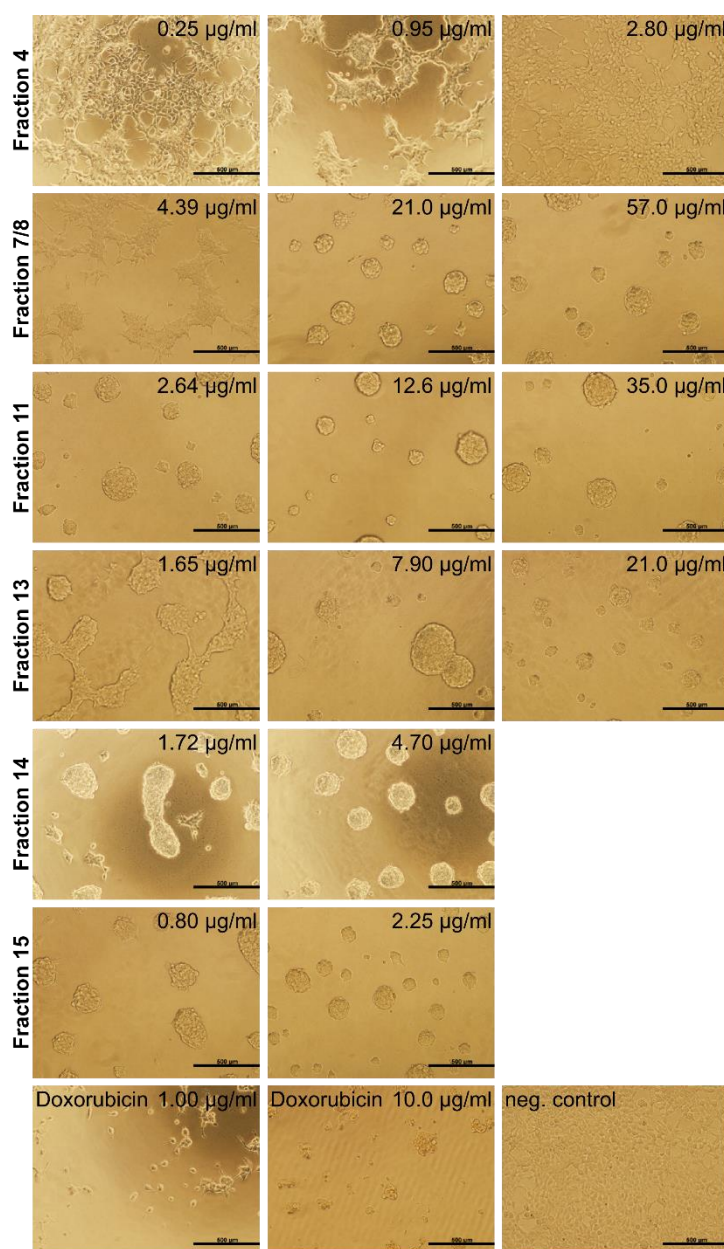

**Figure S12.** SH-SY5Y cells after 48 h treatment with different *P. flavoviridis* venom fractions. Single RP-HPLC venom fractions of *P. flavoviridis* with the mentioned concentration in μg/mL were tested against human neuroblastoma SH-SY5Y cells. Imaged were taken after 48 h treatment at 37 °C. Doxorubicin was used as positive cytotoxic control drug and no stimulation as negative control.

**Table S1. Venom proteins and peptides identified from *Protobothrops flavoviridis*.** Assignment of venom components by crude venom intact mass profiling (IMP, method A), bottom-up (BU, method C) and top-down (TD, method D). Peak numbers are based on the RP-HPLC annotation (Figure 2) and low abundant peaks in the HPLC, but detectable in the IMP, are marked by #. Sequence tags were obtained *de novo* from MS/MS spectra and identified against a non-redundant *Protobothrops flavoviridis* protein database (taxid: 88087) by BLASTP. SDS-PAGE and intact mass profile analysis provided the average molecular weight. Most abundant mass in a IMP TIC are asterisked. Method B with no distinct  $R_T$  are marked by °. Monoisotopic TD masses are marked by an indexed m.

Link for the Excel-File
