# Supplementary material for: Comprehensive Snake Venomics of the Okinawa Habu Pit Viper, Protobothrops flavoviridis, by Complementary Mass Spectrometry-Guided Approaches
Source: Molecules. 2018 Jul 29;23(8):1893. doi: 10.3390/molecules23081893 (PMC6222445; doi:10.3390/molecules23081893)
Supplement: Supplementary file 1 [file molecules-23-01893-s001.zip › molecules-332566-supplementary-table-S1.xlsx]

## Sheet: Table S1. Venom P. flavoviridis
Table S1. Venom proteins and peptides identified from Protobothrops flavoviridis. Assignment of venomic components by crude venom intact mass profiling (IMP, method A), bottom-up (BU, method C) and top-down (TD, method D). Peak numbers are based on the RP-HPLC annotation (Figure 2) and low abundant peaks in the HPLC, but detectable in the IMP, are marked by #. Sequence tags were obtained de novo …
Peak no	Method	Mapp in kDa	Identification sequence tag	Species	Protein ID	E-value	NCBI accession number	RT	Native intact mass of M+H+
1	A				peptide			1.61	338.09, *407.04, 596.32, 936.48
2	A; D		Q[-17.03]SKPGRSPPIS	BPP-RP	Bradykinin-potentiating and C-type natriuretic peptides	2e-07	BAP39952.1	2.88	1136.60m
					peptide			2.88	408.14, 665.01, *1136.60, 1158.58, 1387.73
#	D		Q[-17.03]QWSQGRPR	BPP-RP	Bradykinin-potentiating and C-type natriuretic peptides	1e-06	P0C7P5.1	13.75	1124.54m
#	D		Q[-17.03]SKPGRSPPI	BPP-RP	Bradykinin-potentiating and C-type natriuretic peptides	1e-05	P0C7P5.1	15.28	1049.56m
3	A; C	15			peptide			15.45	723.41, 786.16, *1049.56
4	A; C; D	20	853.42-DGLCCDQCR	svMP/DI	zinc metalloproteinase/disintegrin	6e-07	P18619.2
			VKQPQCADGLCCEQCR		zinc metalloproteinase/disintegrin	5e-09	P18619.2
			pEKW	svMP-i	small tripeptic inhibitor			17.82	*444.22
					peptide			17.82	887.43
5	A; C; D	20	GDNPDDR	svMP/DI	zinc metalloproteinase/disintegrin	0.0006	P14530.3
			RLQPQCADGLCCEQCGV		zinc metalloproteinase/disintegrin	5e-08	P18619.2
			Q[-17.03]SKPGRSPPISP	BPP-RP	Bradykinin-potentiating and C-type natriuretic peptides	0.009	BAP39952.1	19.28	1233.64m
					peptide			19.44	445.26, 1118.59, *1233.65
6	A; D		pENW	svMP-i	small tripeptic inhibitor			20.74	*430.17
					unknown (peptide)			20.74	376.14, 413.14, 859.33
7	A; D		pEQ[-17.03]W	svMP-i	small tripeptic inhibitor			21.88	427.16
			pEQW	svMP-i	small tripeptic inhibitor			21.88	*444.18
					peptide			21.88	316.13, 887.36
8	A				peptide			24.9	374.22, 445.17, 828.28, 1105.54, 1233.60, 7349.03, *7509.06, 7654.13
9	A; C	15			peptide			27.89	*7622.16, 7693.18
10	A; C	15	GDFPDDR	svMP/DI	metalloprotease P-IIa 1/disintegrin	0.0004	BAP39948.1
					peptide			30	*7622.16, 7693.18
11a	A; C	22	GDFPDDR	svMP/DI	metalloprotease P-IIa 1/disintegrin	0.0004	BAP39948.1
					peptide			33.61	413.26, 1733.82, *7484.06
11b	C	20	VKQPQCADGLCCDQCR	svMP/DI	zinc metalloproteinase/disintegrin	6e-10	P18619.2
			CTGQSADCPR		metalloprotease P-II	3e-07	BAN89392.1
			GDFPDDR		metalloprotease P-IIa 1/disintegrin	0.0004	BAP39948.1
12a	A; C	20	GDFPDDR	svMP/DI	metalloprotease P-IIa 1/disintegrin	0.0004	BAP39948.1
12b	C	10	GDFPDDR	svMP/DI	metalloprotease P-IIa 1/disintegrin	0.0004	BAP39948.1
					peptide			36.88	42949.50, 1161.62, 1717.82, 7513.12, *7957.27
13a	A; C	20	GDFPDDR	svMP/DI	metalloprotease P-IIa 1/disintegrin	0.0004	BAP39948.1
					peptide			38.1	1161.62, 1406.70, 1717.83, *7961.27
13b	C	10	GDFPDDR	svMP/DI	metalloprotease P-IIa 1/disintegrin	0.0004	BAP39948.1
	D		TPEQQIFPQRY	svMP/DI	metalloprotease P-II	6.1e-07	BAN89360.1	38.39	1406.69m
14	A; D		SHNSDKIKVRVHQMVNHINEMYRP	svMP/DI	metalloprotease P-IIa	0.0002	BAP39948.1	41.03	2932.45m
			Q[-17.03]QWMPGGRPPHHIPP	BPP-RP	Bradykinin-potentiating and C-type natriuretic peptides	0.0016	BAP39952.1	41.36	1717.82m
					peptide			39.79	426.17, 949.50, 1161.62, 1717.83, *7943.26, 8315.47
15a	C; D	20	RIARGDFPDDRCTGLSDDCPR)[-12.17]WNDL	svMP/DI	zinc metalloproteinase/disintegrin;	3e-08	P18619.2	45.48	4294.11m
			IVVDHGMYKKYSHNSDKIKVRVHQMVNHINEMYRP		metalloprotease P-IIa	0.00053	BAP39948.1	44.09	4266.11m
			ELLEEGEDCYCHIPPNPCCDPATCKLTPGSQCAEGL(CCDQCRFKKKGTICRIARGDFPDDRCTGLSDDCPR)[-12.17]WNDL	DI	disintegrin CTF-II	0.0029	P23323.1	44.71	8311.47m
15b	C	15	YTIYPKPF	PLA2	basic phospholipase A2 BP-II	8e-06	P0DJJ9.1
			NYGLYGCVDDTGGV			0.0009
	A				peptide			44.71	8316.49
					peptide			45.48	1648.82, 4083.98, 8317.48, 13786.42
					peptide			46.95	1116.60, 1377.54,*1531.79, 2548.41, 3854.93, 4523.25, 8297.47, 13786.38
#	A				peptide			48.73	1403.73, *8298.47
#	D		TAHAHGWIDSTIKSGLTAARDVNRASENP	LAAO	L-amino acid oxidase	1.6e-09	BAP39950.1	48.88	3075.50m
16a	C; D	35	YLCSLGNQLPCR	svMP/DI	metalloprotease P-III	4e-07	BAN81997.1
			TPEQQIFPQRYIELA	svMP/DI	metalloprotease P-IIa	9.9e-05	BAP39948.1	56.19	1832.94m
16b	C	25	YTIYPKPF	PLA2	basic phospholipase A2 BP-II	8e-06	P0DJJ9.1
16c	C	20	MDSYSYSWK	PLA2	basic phospholipase A2 BP-II	3e-07	P0DJJ9.1
			NYGLYGCNRGGCV			5e-05
16d	A; C	15	NYGLYGCNCGVGR	PLA2	basic phospholipase A2 BP-II	1e-10	P0DJJ9.1	59.24	*13753.42
			MDSYSYSWK			3e-07
			131.03-LFQETGKEAAK			3e-06
16e	C	10	NYGLYGCNCGVGR	PLA2	basic phospholipase A2 BP-II	1e-10	P0DJJ9.1
			YTIYPKPF			8e-06
17a	C	20	CCFVHECCYEK	PLA2	basic phospholipase A2 PL-X'	3e-09	Q02517.1
			AAAVCFGQNLR		PLA-N(O)	1e-07	BAC56893.1
			303.04-FVHDCCYEK			2e-07
			AFYGCYCGK		phospholipase A2	9e-07	BAG82670.1
			337.11-TFPDIFCTDSCK			2e-06	BAP39946.1
17b	A; C	15	TGVIICGEGTECEK	PLA2	PLA-N(O)	4e-11	BAC56893.1	60.66	13753.43, *14021.19
			142.04-AAAVCFGQNLR			1e-07
			AAAVCFGQNLR			1e-07
			NYGLYGCNCGVGR		basic phospholipase A2 BP-II	1e-10	P0DJJ9.1
17c	C	10	MDSYSYSWK	PLA2	basic phospholipase A2 BP-II	3e-07	P0DJJ9.1
			YTIYPKPF			8e-06
			CGDHLLQFR		basic phospholipase A2 PL-X'	0.008	Q02517.1
	D		HLLQFRKMIKKMTGKEPIV(SYAFYGCYCGKGGRGKPKDATDRCCFVHDCCYEKVTGCDPKWSYYTYSLENGDIVCEGDPYCTKVKCECDKKAAICFRDNLKTYKNRY)[+257.96]MTFPDIFCTDPT	PLA2	basic phospholipase A2 PLA-B	0.00076	P59265.1	60.25	14013.19m
			HLLQFRKMIKKMTGKEPIVSYAFYGCYCGKGGRGKPKDATDRCCFVHDCCYEKVTGCDPKWDYYTYS(LENGDIVCGGDNPCTKVVCECDKAAAICFRDNLKTYKKRYMTFPDIFCTDPTEKC)[+63.12]	PLA2	basic phospholipase A2 PL-Y	0.00034	Q90Y77.1	61.4	14013.14m
18	A; C	15	AAAVCFGQNLR	PLA2	PLA-N(O)	1e-07	BAC56893.1	63.51	*13945.26
			MDSYSYSWK		basic phospholipase A2 BP-II	3e-07	P0DJJ9.1
			CCFLHDCHADEQ		phospholipase A2	0.002	BAA01565.1
	D		HLLQFRKMIKKMTGKEPIVSYAFYGCYCGKGGRGKPKDATDRCCFVHDCCYEKVTGCDPKWSYYTYSLENGDIVCEG(DPYCTKVKCECDKKAAICFRDNLKTYKNRYMTFPDIFCTDPTE)[-107.12]GC	PLA2	basic phospholipase A2 PLA-B	0.0085	P59265.1	62.57	13937.22m
			HLLQFRKMIKKMTGKEPIV(SYAFYGCYCGKGGRGKPKDATDRCCFVHDCCYEKVTGCDPKWSYYTYSLENGDIVCEGDPYCTKVKCECDKKAAICFRDNLKTYKNRYMTFPDIFCTDPTEGC)[-106.79]	PLA2	basic phospholipase A2 PLA-B	1.1e-09	P59265.1	62.8	13937.24m
19a	C	20	YMTFPDIFCTDTEPK		phospholipase A2 precursor	8e-09	AJC52505.1
			AAAVCFGQNLR		PLA-N(O)	1e-07	BAC56893.1
			CCFVHDCCYEK		phospholipase A2	3e-10	BAP39946.1
19b	C	15	SAVIICGEGTECEK	PLA2	PLA-N(O)	3e-09	BAC56893.1
			AAAVCFGQNLR			1e-07
			337.11-TFPDIFCTDPTFNR		phospholipase A2 precursor	1e-08	AJC52505.1
20a	C	50	MEWYPEAAANAER	CRISP	cysteine-rich venom protein	3e-11	BAP39957.1
			NVDFDSESPR		Triflin	6e-07	Q8JI39.1
			VFDHLDWIK	svSP	snake venom serine protease 2	5e-07	O13057.1
			FLVALYTFR			4e-06
20b	C	35	PEKIQNEIIDLHNVEK	CRISP	Triflin	5e-08	Q8JI39.1
			NVDFDSESPR			6e-07
20c	A; C	25	GCENIYMATYPAK	CRISP	Triflin	1e-08	Q8JI39.1	70.26	*24768.2
			243.10-EFTNCDSLVQK			3e-08
			NVDFDSESPR			6e-07
20d	C	24	MEWYPEAAANAER	CRISP	cysteine-rich venom protein	3e-11	BAP39957.1
			YTQIVWYK			3e-06
			174.02-GENIYMATYPAK		Triflin	1e-09	Q8JI39.1
			NVDFDSESPR			6e-07
20e	C	20	MEWYPEAAANAER	CRISP	cysteine-rich venom protein	3e-11	BAP39957.1
			346.10-NIYMATYPAK		Triflin	1e-07	Q8JI39.1
			NVDFDSESPR			6e-07
			FLVALYTFR		cysteine-rich venom protein 2	4e-06	O13057.1
20f	C	17	MEWYPEAAANAER	CRISP	cysteine-rich venom protein	3e-11	BAP39957.1
			KPENKAEIIDLHNSLGV			5e-07
			NVDFDSESPR		Triflin	6e-07	Q8JI39.1
20g	C	15	AAAVCFGQNLR	PLA2	PLA-N(O)	1e-07	BAC56893.1
			SDIYSYSWK	CRISP	cysteine-rich venom protein	9e-07	BAP39957.1
21a	C	35	VMGWGTISATK	svSP	Snake venom serine protease 2	4e-08	O13057.1
			TLCAGILEGGK			3e-07
			ADSGGLPLCDGEIQKVSR			5e-06
			542.29-HSTNVINEDVTKR			1e-06
			VFDHLDWLK			1e-05
21b	A; C	24	KMKAHNEIIDLHNSLR	CRISP	cysteine-rich venom protein	5e-08	BAP39957.1	71.00-71.25	21723.77, 24766.14,*27899.64
			276.08-WYPEAAANSLR			3e-05
			NVDFDSESPR		Triflin	6e-07	Q8JI39.1
			218.11-QNLYMATYPAK			2e-06
21c	C	20	MEWYPEAAANAER	CRISP	cysteine-rich venom protein	3e-11	BAP39957.1
			NVDFDSESPR		Triflin	6e-07	Q8JI39.1
21d	C	17	MEWYPEAASYYK	CRISP	cysteine-rich venom protein	7e-06	BAP39957.1
			NVDFDSESPR		Triflin	6e-07	Q8JI39.1
			FLVALYTFR	svSP	snake venom serine protease 2	4e-06	O13057.1
21e	C	15	356.18-QFENMIIK	PLA2	phospholipase A2	8e-06	BAA01565.1
			SLDLDLSLADLK		hypothetical protein	0.059	BAN82053.1
21f	C	10	FLVALYTFR	svSP	snake venom serine protease 2	4e-06	O13057.1
22a	C	30	VMGWGTISATK	svSP	snake venom serine protease 2	4e-08	O13057.1
			FLVALYTFR			4e-06
			TLCAGILENK			0.0002
22b	C	25	DNLDTYDR	PLA2	phospholipase A2	2e-05	BAA01565.1
22c	A; C	15	370.20-SYSAYGCYCGSVNR	PLA2	phospholipase A2	3e-07	BAA01565.1	73.82	*13764.96
			DNLDTYDR			2e-05
			NLGEQFENMIIK			2e-05
			AAALCFR		phospholipase A2 precursor	0.001	AJC52507.1
22d	C	12	GSILSYSAYGCYCGWNR	PLA2	phospholipase A2	3e-11	BAA01565.1
			QVWQFENMIIK			2e-07
22e	C	10	QVWQFENMIIK	PLA2	phospholipase A2	2e-07	BAA01565.1
			370.23-SYSAYGCYCQDNR			2e-06
23a	C	50	FLVALYTFR	svSP	snake venom serine protease 2	4e-06	O13057.1
23b	C	40			unknown (protein)
23c	C	30	FLVALYTFR	svSP	snake venom serine protease 2	4e-06	O13057.1
			508.18-EEFLEALR		hypothetical protein	0.004	BAN82089.1
24a	A; C	30	ETDYEEFLEIAR	LAAO	L-amino acid oxidase	5e-10	P0C2D5.2	84.71-84.96	*30384.71
			HDDIFAYEK			1e-06	BAN82013.1
			SAGQLEYESLR			0.003
24b	A; C	15	ALSIQSSEEEAFVGK	CTL	C-type lectin beta subunit	4e-09	BAN82010.1	84.71-84.96	*13527.50
25a	C	60	EGWYANLGMPR	LAAO	L-amino acid oxidase	3e-05	BAN82013.1
25b	C	35	ETDYEEFLEIAR	LAAO	L-amino acid oxidase	5e-10	P0C2D5.2
25c	A; C	25	NDEVLDKDIMLIK	svSP	Thrombin-like enzyme Flavoxobin	1e-10	P05620.2	86.75	*25687.40
			VLNEDEQIRNPK			2e-09
25d	C	20	TVLQIWSNK	svMP/DI	metalloprotease P-IIa 1	0.0003	BAP39948.1
25e	C	15	271.06-LQSSEEEAFVGK	CTL	C-type lectin beta subunit	3e-07	BAN82010.1
			STFQYVWIGLR		C-type lectin alpha subunit	7e-07	Q8AV97.1
			356.19-QFENMIIK	PLA2	phospholipase A2	8e-06	BAA01565.1
26a	C	70	VVSLNVLCTECR	5-N	5`-nucleotidase	3e-09	BAP39972.1
			YLGYLAG-1214.63			0.082
26b	C	60	LGGDDANFFQALDFK	LAAO	L-amino acid oxidase	5e-10	BAN82013.1
			SAGQLYEESLR			2e-07
			KFWEDDKHNK			0.002
			ETDYEEFLEIAR		Apoxin I-like protein OHAP-1	5e-10	P0C2D5.2
26c	C	25	FLVALYTFR	svSP	snake venom serine protease 2	4e-06	O13057.1
			VLNEDEQIR		Thrombin-like enzyme Flavoxobin	4e-06	P05620.2
26d	C	23	TPEQQIFPQR	svMP/DI	metalloprotease P-IIa 1	1e-07	BAP39948.1
27a	C	110	TPEQQIFPQR	svMP/DI	metalloprotease P-IIa 1	1e-07	BAP39948.1
			1309.70-LTTGQVIGLAYK			0.0006
			NSVGIVK		zinc metalloproteinase/disintegrin	0.003	P14530.3
27b	C	25	CEACIMSAVISDKPSK	svMP/DI	zinc metalloproteinase/disintegrin	2e-13	P14530.3
			TPEQQIFPQR		metalloprotease P-IIa 1	1e-07	BAP39948.1
			YIELAIVVDH-479.22			3e-07
			ASASPGLLNGTDIFNTGNIIGLAYK		metalloprotease P-II	1e-07	BAN81998.1
27c	C	23	CEACIMSAVISDKPSK	svMP/DI	zinc metalloproteinase/disintegrin	2e-13	P14530.3
			DYYQTFLTNKS			1e-06
			DHGALGPGWGTDVNFTGKGIGLAYK		metalloprotease P-II	2e-06	BAN81998.1
			VTDLDSILAEVK		hypothetical protein	0.002	BAN82044.1
27d	C	15	YIELAIVVDHMYGK	svMP/DI	zinc metalloproteinase/disintegrin	9e-09	P14530.3
			TPEQQIFPQR		metalloprotease P-IIa 1	1e-07	BAP39948.1
			STFQYVWIGLR	CTL	C-type lectin alpha subunit	7e-07	BAN81988.1
			1398.64-FVAQLVGDR		C-type lectin F IX/X A	0.032	BAP39954.1
28a	C	110	TLGMLMEKK	PDE	phosphodiesterase	0.0003	BAN82022.1
			VYRRHLTGLNFYSKK			0.0004	BAN82023.1
28b	C	50	AAVSQDACFQFNR	svMP/DI	zinc metalloproteinase-DI-like HV1	3e-10	Q90ZI3.1
			LYCIDSSPAK			5e-07
			LLVQSVPDVTLK			3e-06
			ETDYEEFLEIAR	LAAO	Apoxin I-like protein OHAP-1	5e-10	P0C2D5.2
28c	C	30	DNEVLDKDIMLIK	svSP	serine protease	8e-09	BAP39955.1
			LLVQSVPDVLTK	svMP/DI	zinc metalloproteinase-DI-like HV1	0.005	Q90ZI3.1
28d	C	25	YIELAIVVDHYMGK	svMP/DI	metalloprotease P-IIa 1	6e-07	BAP39948.1
			HDQWPLNGSDINFTGNIIKAYK		metalloprotease P-II	4e-06	BAN81998.1
			616.2-MSAVISDGLNR		zinc metalloproteinase/DI-like HR1a	0.003	Q8JIR2.1
28e	C	15	STFQYVWIGLR	CTL	C-type lectin alpha subunit	7e-07	BAN81988.1
			NWEDAESHEGEEPGK		C-type lectin A	0.001	BAP39968.1
28f	C	12	AWAEESYCVYFK	CTL	C-type lectin F IX/X B	2e-10	BAP39964.1
			AWSGGSDCIVSK		C-type lectin beta subunit	9e-09	BAN82011.1
			384.23-QSSEEEAFVGK			2e-07	BAN82010.1
			WEWSDDAR			3e-06
29a	C	110			unknown (protein)
29b	C	50	LYCIDSSPAK	svMP/DI	zinc metalloproteinase-DI-like HV1	5e-07	Q90ZI3.1
			LLVQSVPDVTLK			3e-06
29c	C	30	LLVQSVPDVTLK	svMP/DI	zinc metalloproteinase-DI-like HV1	3e-06	Q90ZI3.1
			FLVALYEFK	svSP	serine protease	0.001	BAN82036.1
29d	C	25	LYCIDSSPAK	svMP/DI	zinc metalloproteinase-DI-like HV1	5e-07	Q90ZI3.1
29e	C	15	TSFQYVWIGLR	CTL	C-type lectin alpha subunit	8e-09	BAN81988.1
			NWEDAESFMSSEGPK			5e-05
			1226.58-GDFVAQLVTVK		C-type lectin F IX/X A	0.0003	BAP39954.1
29f	C	12	AWAEESYCVYFK	CTL	C-type lectin F IX/X B	2e-10	BAP39964.1
			384.24-GASSEEEAFVGK		C-type lectin beta subunit	5e-06	BAN82010.1
			186.7-EWSDDAR			0.0002
30a	C	110	DFYTFDSEGIVK	PDE	phosphodiesterase	2e-09	BAN82022.1
			711.39-LTGLNFYSGLK			2e-07
			LANVLCSCSEDSWEK			2e-07
			CSSITELEK			1e-05
30b	C	70	LWYQLVNTINNIYR	svMP/DI	zinc metalloproteinase/DI-like HR1b	3e-10	P20164.4
			AIVVDHGIVTK			2e-07
30c	C	60	KDGDANFFQALDFK	LAAO	L-amino acid oxidase	5e-08	BAN82013.1
			590.30-LVNTLNQVYR	svMP/DI	zinc metalloproteinase/DI-like HR1a	0.0003	Q8JIR2.1
30d	C	30	FLVALYTFR	svSP	snake venom serine protease 2	4e-06	O13057.1
			TSFQYVWLKR	CTL	Flavocetin-A alpha subunit	0.0001	Q8AV97.1
30e	C	25	SKNGHPLTAPPAQLFSDCSK	svMP/DI	metalloprotease P-II	3e-07	BAN81998.1
			1262.57-NFTGQVIGLAYK		metalloprotease P-IIa 1	2e-06	BAP39948.1
			TSFQYVWIGLR	CTL	Flavocetin-A alpha subunit	8e-09	Q8AV97.1
30f	C	15	434.20-NVYCGTENPFVCK	CTL	C-type lectin alpha subunit	4e-11	BAN81988.1
			188.08-FQYVWIGLR			5e-07
			323.09-YCYQAFSKPK		Flavocetin-A alpha subunit	8e-08	AAB34807.1
			1226.57-FDGVAQLVAEK			0.0007	Q8AV97.1
30g	C	12	231.79-STLQYTSMWIGLK	CTL	C-type lectin beta subunit	7e-10	BAN82010.1
			184.12-SIQSSEEEAFVGK			3e-09
			257.11-AEESYCVYFK		C-type lectin F IX/X B	1e-07	BAP39964.1
30h	C	9	1432.74-LVAQLVTVK	CTL	C-type lectin F IX/X A	0.065	BAP39954.1
31a	C	110	WCVKAAVAPDSGDFVAQLVAEK	CTL	C-type lectin A	2e-06	BAP39968.1
			STFQYVWLKR		Flavocetin-A alpha subunit	0.014	Q8AV97.1
			508.18-EEFLEIAR	LAAO	L-amino acid oxidase	5e-05	BAN82013.1
			212.15-LVATEVMVR	svMP/DI	Flavorase	0.045	BAK64383.1
31b	C	50	269.18-EDGLKDGLCCYQCR	svMP/DI	Flavorase	8e-07	BAK64383.1
			FSIAGAECR			1e-05
			LVIVADDVHAPP			0.0004
			SSKSLLNVLTLIYR			0.0002
31c	C	25	335.15-QYVWLKR	CTL	C-type lectin alpha subunit	0.028	BAN81988.1
31d	C	22			unknown (protein)
31e	C	15	TSFQYVWIGLR	CTL	C-type lectin alpha subunit	8e-09	BAN81988.1
			1226.57-GDFVAQLVAEK		C-type lectin A	2e-06	BAP39968.1
32a	C	110	DFYTFDSEKVK	PDE	phosphodiesterase	3e-05	BAN82022.1
			711.38-LTGLNFYSKK			0.0001
32b	C	70	TWVYEIVNTLNEIYR	svMP/DI	metalloprotease P-III	9e-14	BAN81999.1
			LYCSLGNQLPCR			1e-09
			FNSNLNEVK			7e-06
			TCTGLVQDYSSR			4e-05
			LFELVIVADYR	LAAO	L-amino acid oxidase	2e-07	BAN82013.1
32c	C	60	ETDYEEFLEIAR	LAAO	Apoxin I-like protein OHAP-1	5e-10	P0C2D5.2
			342.14-DANFFQALDFK		L-amino acid oxidase	3e-08	BAN82013.1
			820.38-VNLILQR	svMP/DI	metalloprotease P-III	0.0009	BAN82009.1
32d	C	25	1262.56-NFTGNIIGLAYK	svMP/DI	metalloprotease P-IIa 1	6e-09	BAP39948.1
32e	C	15	TSFQYVWIGLR	CTL	C-type lectin alpha subunit	8e-09	BAN81988.1
			HYEDAESF-716.31			0.018
32f	C	12	AWAEESYCVYFK	CTL	C-type lectin F IX/X B	2e-10	BAP39964.1
			ALSIQSSEEEAFVGK		C-type lectin beta subunit	4e-09	BAN82010.1
			TSFQYVWLKR		Flavocetin-A alpha subunit	0.0001	Q8AV97.1
